# Supplementary material for: Water-assisted absorption of CO2 by 3-amino-1-propanol: a mechanistic insight
Source: Royal Society of Chemistry journal article supplement (doi:10.1039/d4cp02207f), 2024-01-01
Supplement: d4cp02207f2.pdf [file d4cp02207f2.pdf]

## Supporting Information

### Water-assisted absorption of CO<sub>2</sub> by 3-Amino-1-propanol: A mechanistic insight

Shivam Rawat and C.N. Ramachandran\*

Department of Chemistry, Indian Institute of Technology Roorkee, Roorkee, Uttarakhand,  
India-247667

\*e-mail: [ramcn@cy.iitr.ac.in](mailto:ramcn@cy.iitr.ac.in)

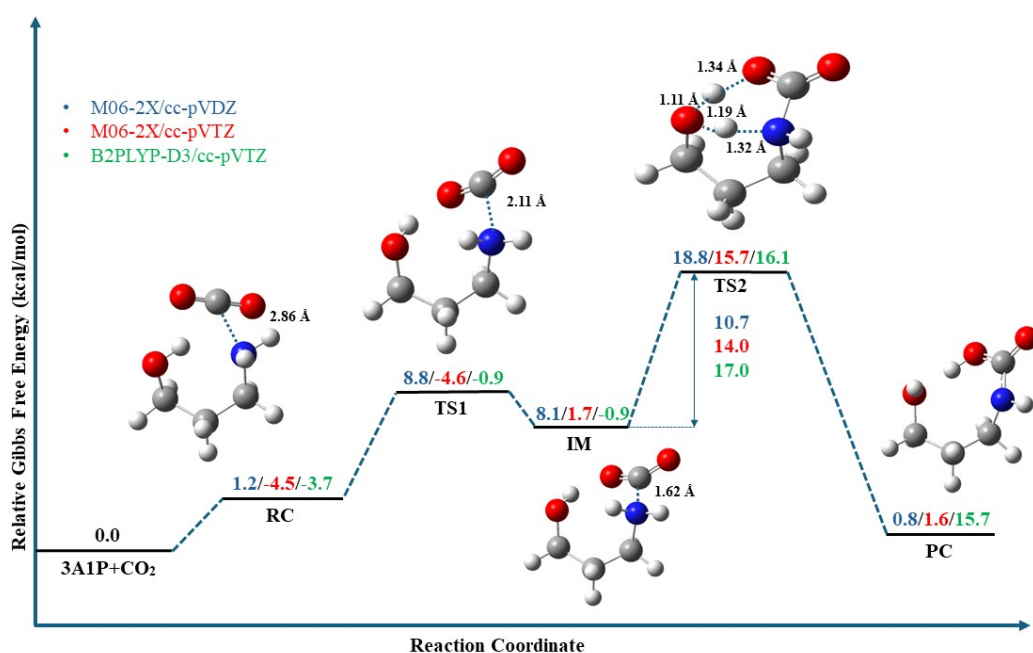

**Figure S1:** The mechanism and the energy profile diagram for the CO<sub>2</sub> absorption using 3-amino-1-propanol involving two proton transfer in the absence of water molecules at different levels. The optimized geometries obtained at M06-2X/cc-pVDZ are used for the single point energy calculations at M06-2X/cc-pVTZ and B2PLYP-D3/cc-pVTZ levels.

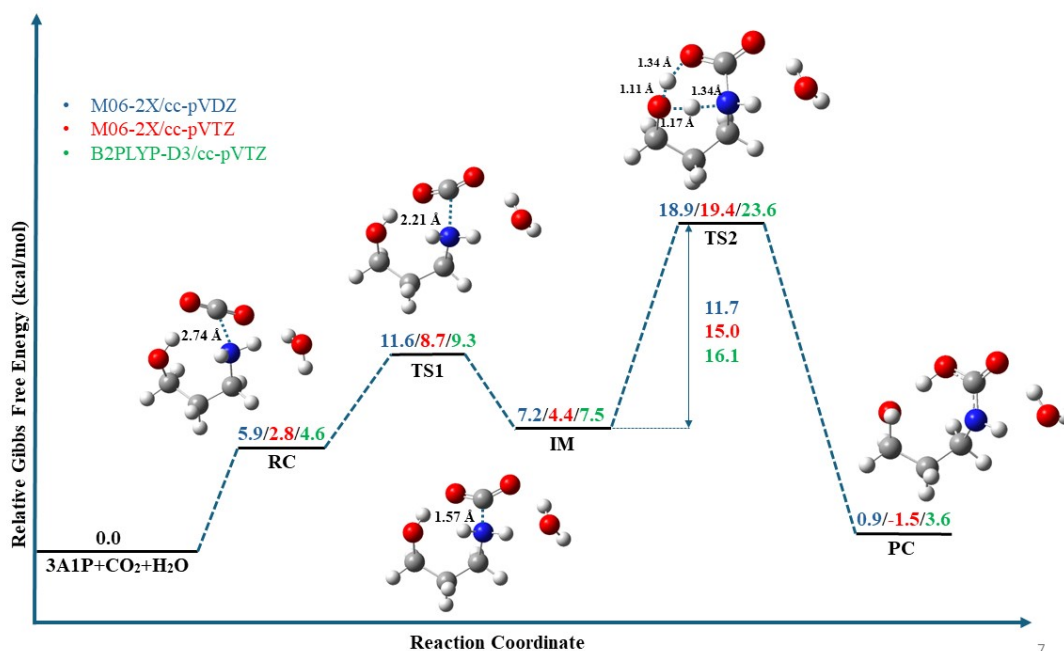

7

**Figure S2:** The mechanism and the energy profile diagram for the CO<sub>2</sub> absorption using 3-amino-1-propanol in the presence one water molecule where no water molecule is participating in the proton transfer. The optimized geometries obtained at M06-2X/cc-pVDZ are used for the single point energy calculations at M06-2X/cc-pVTZ and B2PLYP-D3/cc-pVTZ levels.

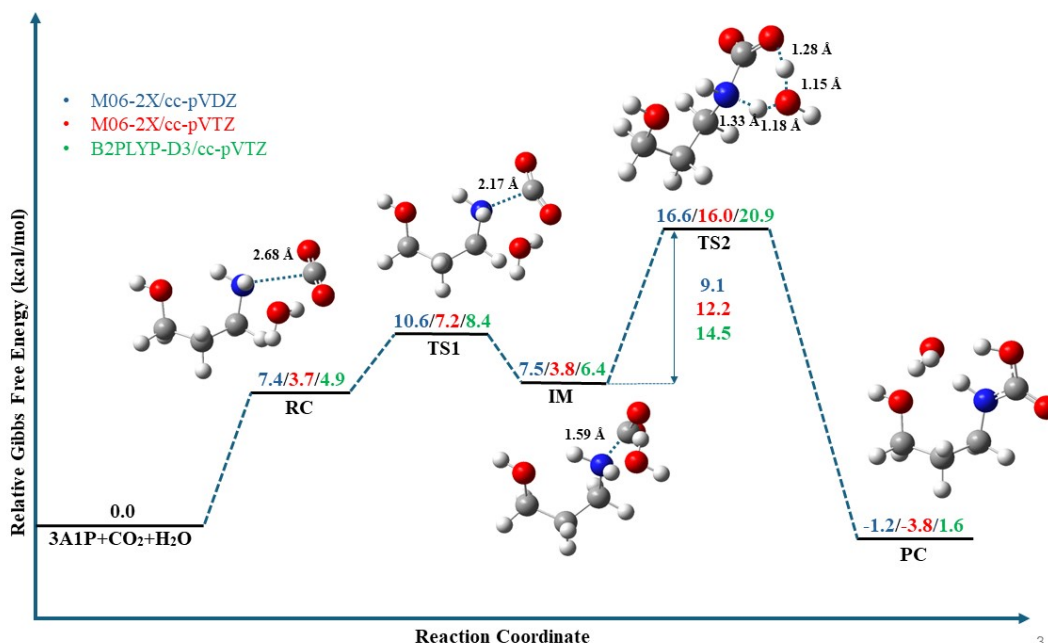

3

**Figure S3:** The mechanism and the energy profile diagram for the CO<sub>2</sub> absorption using 3-amino-1-propanol involving two proton transfer in the presence of one water molecule. The optimized geometries obtained at M06-2X/cc-pVDZ are used for the single point energy calculations at M06-2X/cc-pVTZ and B2PLYP-D3/cc-pVTZ levels.

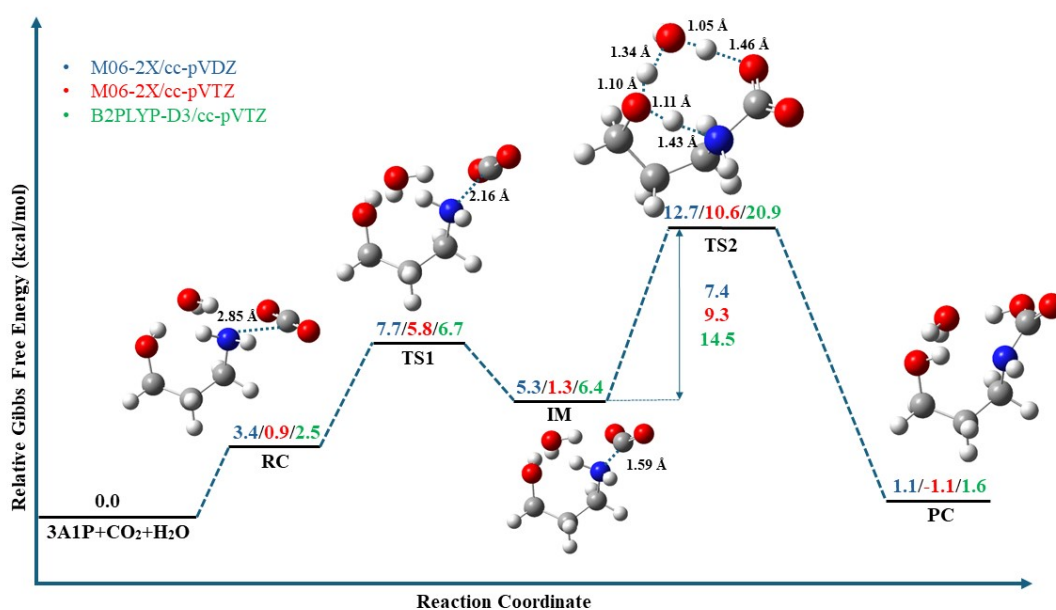

4

**Figure S4:** The mechanism and the energy profile diagram for the CO<sub>2</sub> absorption using 3-amino-1-propanol involving three proton transfer in the presence of one water molecule. The optimized geometries obtained at M06-2X/cc-pVDZ are used for the single point energy calculations at M06-2X/cc-pVTZ and B2PLYP-D3/cc-pVTZ levels

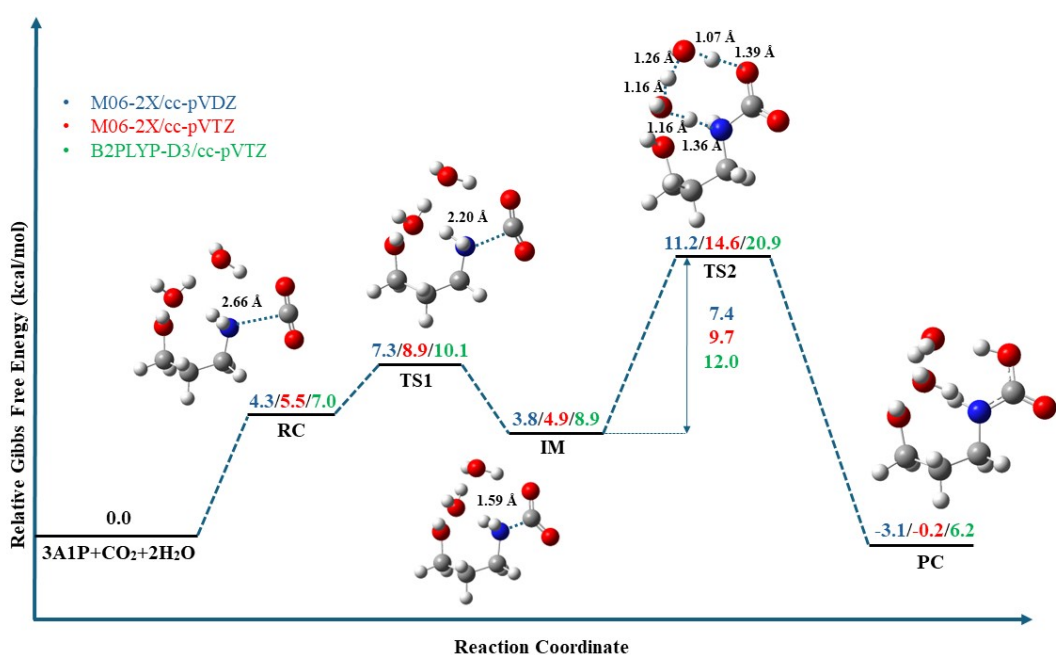

5

**Figure S5:** The mechanism and the energy profile diagram for the CO<sub>2</sub> absorption using 3-amino-1-propanol involving three proton transfer in the presence of two water molecules. The optimized geometries obtained at M06-2X/cc-pVDZ are used for the single point energy calculations at M06-2X/cc-pVTZ and B2PLYP-D3/cc-pVTZ levels.

**Table S1:** Natural bond orbital analysis of the transition states involving the proton transfer

| Case | Transition state involving proton transfer                                          | NBO Donor             | NBO Acceptor                                  | $\Delta E^{(2)}_{ij}$ (kcal/mol) | Inference                                                                                                                                           |
|------|-------------------------------------------------------------------------------------|-----------------------|-----------------------------------------------|----------------------------------|-----------------------------------------------------------------------------------------------------------------------------------------------------|
| (i)  | 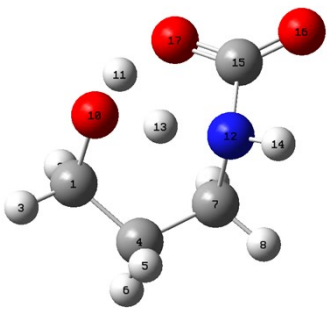   | LP (N <sub>12</sub> ) | $\sigma^*$ (O <sub>10</sub> H <sub>13</sub> ) | 139                              | Leads to large internuclear distance for O <sub>10</sub> H <sub>13</sub> indicating less favorable transfer of H <sub>13</sub> from N <sub>12</sub> |
|      |                                                                                     | LP (O <sub>17</sub> ) | $\sigma^*$ (O <sub>10</sub> H <sub>11</sub> ) | 123                              | Leads to the elongation of O <sub>10</sub> H <sub>11</sub> bond, indicating favorable transfer of H <sub>11</sub> towards O <sub>17</sub>           |
| (ii) |  | LP (N <sub>12</sub> ) | $\sigma^*$ (O <sub>18</sub> H <sub>14</sub> ) | 137                              | Leads to large internuclear distance for O <sub>18</sub> H <sub>14</sub> indicating less favorable transfer of H <sub>14</sub> from N <sub>12</sub> |
|      |                                                                                     | LP (O <sub>17</sub> ) | $\sigma^*$ (O <sub>18</sub> H <sub>19</sub> ) | 144                              | Leads to the elongation of O <sub>18</sub> H <sub>19</sub> bond, indicating favorable transfer of H <sub>19</sub> towards O <sub>17</sub>           |

|       |  |                       |                                               |     |                                                                                                                                                     |
|-------|--|-----------------------|-----------------------------------------------|-----|-----------------------------------------------------------------------------------------------------------------------------------------------------|
| (iii) |  | LP (N <sub>12</sub> ) | $\sigma^*$ (O <sub>10</sub> H <sub>13</sub> ) | 98  | Leads to large internuclear distance for O <sub>10</sub> H <sub>13</sub> indicating less favorable transfer of H <sub>13</sub> from N <sub>12</sub> |
|       |  | LP (O <sub>16</sub> ) | $\sigma^*$ (O <sub>18</sub> H <sub>20</sub> ) | 83  | Leads to the elongation of O <sub>18</sub> H <sub>20</sub> bond, indicating favorable transfer of H <sub>20</sub> towards O <sub>16</sub>           |
|       |  | LP (O <sub>18</sub> ) | $\sigma^*$ (O <sub>10</sub> H <sub>11</sub> ) | 109 | Leads to the elongation of O <sub>10</sub> H <sub>11</sub> bond, indicating favorable transfer of H <sub>11</sub> towards O <sub>18</sub>           |

|      |  |                                               |                                               |     |                                                                                                                                                                                                                                                                       |
|------|--|-----------------------------------------------|-----------------------------------------------|-----|-----------------------------------------------------------------------------------------------------------------------------------------------------------------------------------------------------------------------------------------------------------------------|
| (iv) |  | LP (N <sub>12</sub> )                         | $\sigma^*$ (O <sub>21</sub> H <sub>14</sub> ) | 125 | Leads to large internuclear distance for O <sub>21</sub> H <sub>14</sub> indicating non favorable transfer of H <sub>14</sub> from N <sub>12</sub>                                                                                                                    |
|      |  | LP (O <sub>17</sub> )                         | $\sigma^*$ (O <sub>18</sub> H <sub>19</sub> ) | 103 | Leads to the elongation of O <sub>18</sub> H <sub>19</sub> bond, indicating favorable transfer of H <sub>19</sub> towards O <sub>17</sub>                                                                                                                             |
|      |  | LP (O <sub>18</sub> )                         | $\sigma^*$ (O <sub>21</sub> H <sub>23</sub> ) | 145 | Leads to the elongation of O <sub>21</sub> H <sub>23</sub> bond, indicating favorable transfer of H <sub>23</sub> towards O <sub>18</sub>                                                                                                                             |
|      |  | $\sigma^*$ (O <sub>21</sub> H <sub>14</sub> ) | $\sigma^*$ (O <sub>21</sub> H <sub>23</sub> ) | 13  | Leads to small internuclear distance for O <sub>21</sub> H <sub>14</sub> and O <sub>21</sub> H <sub>23</sub> bond elongation, indicating favorable transfer of H <sub>14</sub> towards O <sub>21</sub> and favorable transfer of H <sub>23</sub> from O <sub>21</sub> |
|      |  | $\sigma$ (O <sub>18</sub> H <sub>19</sub> )   | $\sigma^*$ (O <sub>21</sub> H <sub>23</sub> ) | 14  | Leads to the elongation of O <sub>18</sub> H <sub>19</sub> and O <sub>21</sub> H <sub>23</sub> bonds indicating favorable transfer of H <sub>19</sub> from O <sub>18</sub> and H <sub>23</sub> from O <sub>21</sub>                                                   |



**Table S2:** The electron density ( $\rho$ ) and Laplacian of electron density ( $\nabla^2(\rho)$ ) at relevant (3,-1) critical points for various species involved in the proton transfer of different systems.

| CO <sub>2</sub> -3A1P-H <sub>2</sub> O involving two proton transfer |        |                |                                    |                                                   |                                                                |                                                                                                                                                                                   |
|----------------------------------------------------------------------|--------|----------------|------------------------------------|---------------------------------------------------|----------------------------------------------------------------|-----------------------------------------------------------------------------------------------------------------------------------------------------------------------------------|
| Species                                                              | Figure | Critical point | Interaction type                   | Electron density (e/a <sub>0</sub> <sup>3</sup> ) | Laplacian of electron density (e/a <sub>0</sub> <sup>5</sup> ) | Inference                                                                                                                                                                         |
| RC                                                                   |        | 1              | N---C <sub>CO2</sub>               | 0.018                                             | 0.060                                                          |                                                                                                                                                                                   |
|                                                                      |        | 2              | H <sub>W</sub> ---O <sub>CO2</sub> | 0.017                                             | 0.062                                                          |                                                                                                                                                                                   |
|                                                                      |        | 3              | H <sub>N</sub> ---O <sub>W</sub>   | 0.017                                             | 0.051                                                          |                                                                                                                                                                                   |
|                                                                      |        | 4              | H <sub>N</sub> ---O <sub>OH</sub>  | 0.019                                             | 0.061                                                          |                                                                                                                                                                                   |
| TS1                                                                  |        | 1              | N---C <sub>CO2</sub>               | 0.055                                             | 0.104                                                          | Strength of N---C <sub>CO2</sub> is slightly increased. However, due to the bending of CO <sub>2</sub> 175 <sup>o</sup> to 159 <sup>o</sup> overall energy is increased w.r.t. RC |
|                                                                      |        | 2              | H <sub>W</sub> ---O <sub>CO2</sub> | 0.019                                             | 0.068                                                          |                                                                                                                                                                                   |
|                                                                      |        | 3              | H <sub>N</sub> ---O <sub>W</sub>   | 0.018                                             | 0.057                                                          |                                                                                                                                                                                   |
|                                                                      |        | 4              | H <sub>N</sub> ---O <sub>OH</sub>  | 0.019                                             | 0.063                                                          |                                                                                                                                                                                   |



|     |                                                                                    |   |                                    |       |        |                                                                                                                                                                                                                                                                                                                                                                                             |
|-----|------------------------------------------------------------------------------------|---|------------------------------------|-------|--------|---------------------------------------------------------------------------------------------------------------------------------------------------------------------------------------------------------------------------------------------------------------------------------------------------------------------------------------------------------------------------------------------|
| IM  | 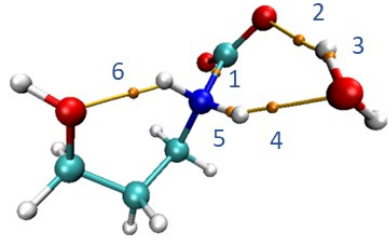  | 1 | N---C <sub>CO2</sub>               | 0.198 | -0.262 | <p>Strength of N---C<sub>CO2</sub> increased</p> <p>Strength of H<sub>w</sub>---O<sub>CO2</sub> increased</p> <p>Strength of O<sub>w</sub>---H<sub>N</sub> increased</p> <p>Strength of H<sub>N</sub>---O<sub>OH</sub> increased</p> <p>Overall energy is decreased w.r.t. TS1</p>                                                                                                          |
|     |                                                                                    | 2 | H <sub>w</sub> ---O <sub>CO2</sub> | 0.033 | 0.114  |                                                                                                                                                                                                                                                                                                                                                                                             |
|     |                                                                                    | 3 | O <sub>w</sub> ---H <sub>w</sub>   | 0.326 | -2.242 |                                                                                                                                                                                                                                                                                                                                                                                             |
|     |                                                                                    | 4 | H <sub>N</sub> ---O <sub>w</sub>   | 0.032 | 0.105  |                                                                                                                                                                                                                                                                                                                                                                                             |
|     |                                                                                    | 5 | H <sub>N</sub> ---N                | 0.312 | -1.515 |                                                                                                                                                                                                                                                                                                                                                                                             |
|     |                                                                                    | 6 | O <sub>OH</sub> ---H <sub>N</sub>  | 0.029 | 0.103  |                                                                                                                                                                                                                                                                                                                                                                                             |
| TS2 |  | 1 | N---C <sub>CO2</sub>               | 0.255 | -0.587 | <p>Strength of N---C<sub>CO2</sub> increased</p> <p>Strength of H<sub>w</sub>---O<sub>CO2</sub> increased</p> <p>Strength of O<sub>w</sub>---H<sub>w</sub> decreased</p> <p>Strength of H<sub>N</sub>---O<sub>w</sub> increased</p> <p>Strength of H<sub>N</sub>---N decreased</p> <p>Strength of O<sub>OH</sub>---H<sub>N</sub> decreased</p> <p>Overall energy is increased w.r.t. IM</p> |
|     |                                                                                    | 2 | H <sub>w</sub> ---O <sub>CO2</sub> | 0.136 | -0.103 |                                                                                                                                                                                                                                                                                                                                                                                             |
|     |                                                                                    | 3 | O <sub>w</sub> ---H <sub>w</sub>   | 0.130 | -0.447 |                                                                                                                                                                                                                                                                                                                                                                                             |
|     |                                                                                    | 4 | H <sub>N</sub> ---O <sub>w</sub>   | 0.178 | -0.332 |                                                                                                                                                                                                                                                                                                                                                                                             |
|     |                                                                                    | 5 | H <sub>N</sub> ---N                | 0.140 | -0.219 |                                                                                                                                                                                                                                                                                                                                                                                             |
|     |                                                                                    | 6 | O <sub>OH</sub> ---H <sub>N</sub>  | 0.027 | 0.093  |                                                                                                                                                                                                                                                                                                                                                                                             |

|    |                                                                                   |   |                                      |       |        |                                                                                                                                                                                                                                   |
|----|-----------------------------------------------------------------------------------|---|--------------------------------------|-------|--------|-----------------------------------------------------------------------------------------------------------------------------------------------------------------------------------------------------------------------------------|
| PC | 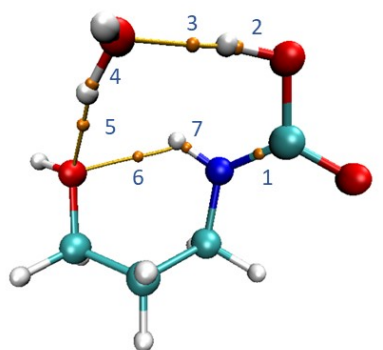 | 1 | N---C <sub>CO2</sub>                 | 0.321 | -1.056 | <p>Strong N---C<sub>CO2</sub> interaction leading to N- C bond formation</p> <p>Additional bond formations: H<sub>CO2</sub>---O<sub>CO2</sub> and H<sub>W</sub>---O<sub>W</sub></p> <p>Overall energy is decreased w.r.t. TS2</p> |
|    |                                                                                   | 2 | H <sub>CO2</sub> ---O <sub>CO2</sub> | 0.314 | -2.118 |                                                                                                                                                                                                                                   |
|    |                                                                                   | 3 | O <sub>W</sub> ---H <sub>CO2</sub>   | 0.043 | 0.146  |                                                                                                                                                                                                                                   |
|    |                                                                                   | 4 | H <sub>W</sub> ---O <sub>W</sub>     | 0.326 | -2.283 |                                                                                                                                                                                                                                   |
|    |                                                                                   | 5 | H <sub>W</sub> ---O <sub>OH</sub>    | 0.031 | 0.121  |                                                                                                                                                                                                                                   |
|    |                                                                                   | 6 | H <sub>N</sub> ---O <sub>OH</sub>    | 0.020 | 0.068  |                                                                                                                                                                                                                                   |
|    |                                                                                   | 7 | H <sub>N</sub> ---N                  | 0.330 | -1.55  |                                                                                                                                                                                                                                   |

**CO<sub>2</sub>-3A1P-H<sub>2</sub>O involving three proton transfer**

| Species | Figure                                                                             | Critical point | Interaction type                   | Electron density (a.u.) | Laplacian | Inference |
|---------|------------------------------------------------------------------------------------|----------------|------------------------------------|-------------------------|-----------|-----------|
| RC      | 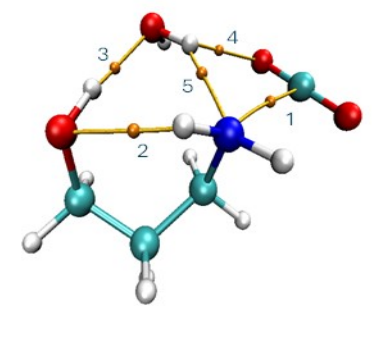 | 1              | N---C <sub>CO2</sub>               | 0.012                   | 0.044     |           |
|         |                                                                                    | 2              | H <sub>N</sub> ---O <sub>OH</sub>  | 0.017                   | 0.055     |           |
|         |                                                                                    | 3              | H <sub>OH</sub> ---O <sub>W</sub>  | 0.034                   | 0.124     |           |
|         |                                                                                    | 4              | H <sub>W</sub> ---O <sub>CO2</sub> | 0.010                   | 0.043     |           |
|         |                                                                                    | 5              | H <sub>W</sub> ---N                | 0.032                   | 0.099     |           |

|     |  |   |                                    |       |        |                                                                                                                                                                   |
|-----|--|---|------------------------------------|-------|--------|-------------------------------------------------------------------------------------------------------------------------------------------------------------------|
| TS1 |  | 1 | N---C <sub>CO2</sub>               | 0.057 | 0.104  | Strength of N---C <sub>CO2</sub> slightly increased                                                                                                               |
|     |  | 2 | H <sub>N</sub> ---O <sub>OH</sub>  | 0.019 | 0.059  | Strength of H <sub>W</sub> ---O <sub>CO2</sub> slightly increased                                                                                                 |
|     |  | 3 | H <sub>OH</sub> ---O <sub>W</sub>  | 0.037 | 0.138  | Strong H <sub>W</sub> ---N interaction disappeared.<br>In addition, due to the bending of CO <sub>2</sub> from 178° to 158° overall energy is increased w.r.t. RC |
|     |  | 4 | H <sub>W</sub> ---O <sub>CO2</sub> | 0.023 | 0.093  |                                                                                                                                                                   |
| IM  |  | 1 | N---C <sub>CO2</sub>               | 0.196 | -0.251 |                                                                                                                                                                   |
|     |  | 2 | H <sub>N</sub> ---N                | 0.313 | -1.525 |                                                                                                                                                                   |
|     |  | 3 | H <sub>N</sub> ---O <sub>OH</sub>  | 0.030 | 0.094  | Strength of N---C <sub>CO2</sub> increased                                                                                                                        |
|     |  | 4 | H <sub>OH</sub> ---O <sub>OH</sub> | 0.321 | -2.203 | Strength of H <sub>N</sub> ---O <sub>OH</sub> slightly increased                                                                                                  |
|     |  | 5 | H <sub>OH</sub> ---O <sub>W</sub>  | 0.043 | 0.150  | Strength of H <sub>W</sub> ---O <sub>CO2</sub> slightly increased                                                                                                 |
|     |  | 6 | H <sub>W</sub> ---O <sub>W</sub>   | 0.318 | -2.249 | Overall energy is decreased w.r.t. TS1                                                                                                                            |
|     |  | 7 | H <sub>W</sub> ---O <sub>CO2</sub> | 0.038 | 0.141  |                                                                                                                                                                   |

|     |                                                                                    |   |                                      |        |        |                                                                                                                                                                                                                                                                             |
|-----|------------------------------------------------------------------------------------|---|--------------------------------------|--------|--------|-----------------------------------------------------------------------------------------------------------------------------------------------------------------------------------------------------------------------------------------------------------------------------|
| TS2 | 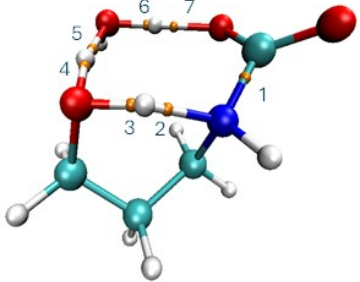  | 1 | N---C <sub>CO2</sub>                 | 0.256  | -0.607 | Strength of N---C <sub>CO2</sub> slightly increased                                                                                                                                                                                                                         |
|     |                                                                                    | 2 | H <sub>N</sub> ---N                  | 0.110  | -0.035 | Strength of H <sub>N</sub> ---N decreased                                                                                                                                                                                                                                   |
|     |                                                                                    | 3 | H <sub>N</sub> ---O <sub>OH</sub>    | 0.218  | -0.681 | Strength of H <sub>N</sub> ---O <sub>OH</sub> increased<br>Strength of H <sub>OH</sub> ---O <sub>OH</sub> decreased                                                                                                                                                         |
|     |                                                                                    | 4 | H <sub>OH</sub> ---O <sub>OH</sub>   | 0.222  | -0.794 | Strength of H <sub>OH</sub> ---O <sub>W</sub> increased                                                                                                                                                                                                                     |
|     |                                                                                    | 5 | H <sub>OH</sub> ---O <sub>W</sub>    | 0.114  | 0.016  | Strength of H <sub>W</sub> ---O <sub>W</sub> decreased<br>Strength of H <sub>W</sub> ---O <sub>CO2</sub> slightly increased                                                                                                                                                 |
|     |                                                                                    | 6 | H <sub>W</sub> ---O <sub>W</sub>     | 0.255  | -1.351 | Overall energy is increased w.r.t. IM                                                                                                                                                                                                                                       |
|     |                                                                                    | 7 | H <sub>W</sub> ---O <sub>CO2</sub>   | 0.083  | 0.127  |                                                                                                                                                                                                                                                                             |
| PC  |  | 1 | N---C <sub>CO2</sub>                 | 0.307  | -0.946 | Strongest N---C <sub>CO2</sub> interaction leading to N- C bond formation<br><br>Additional bond formations: H <sub>OH</sub> ---O <sub>OH</sub> , H <sub>CO2</sub> ---O <sub>CO2</sub> and H <sub>OH</sub> ---O <sub>OH</sub><br><br>Overall energy is decreased w.r.t. TS2 |
|     |                                                                                    | 2 | H <sub>OH</sub> ---N                 | 0.0232 | 0.068  |                                                                                                                                                                                                                                                                             |
|     |                                                                                    | 3 | H <sub>OH</sub> ---O <sub>OH</sub>   | 0.337  | -2.249 |                                                                                                                                                                                                                                                                             |
|     |                                                                                    | 4 | H <sub>W</sub> ---O <sub>OH</sub>    | 0.041  | 0.139  |                                                                                                                                                                                                                                                                             |
|     |                                                                                    | 5 | H <sub>OH</sub> ---O <sub>W</sub>    | 0.316  | -2.206 |                                                                                                                                                                                                                                                                             |
|     |                                                                                    | 6 | H <sub>CO2</sub> ---O <sub>W</sub>   | 0.054  | 0.166  |                                                                                                                                                                                                                                                                             |
|     |                                                                                    | 7 | H <sub>CO2</sub> ---O <sub>CO2</sub> | 0.300  | -1.987 |                                                                                                                                                                                                                                                                             |

**CO<sub>2</sub>-3A1P-2H<sub>2</sub>O involving three proton transfer**

| Species | Figure                                                                              | Critical point | Interaction type                    | Electron density (a.u.) | Laplacian | Inference                                                                                                                                                                         |
|---------|-------------------------------------------------------------------------------------|----------------|-------------------------------------|-------------------------|-----------|-----------------------------------------------------------------------------------------------------------------------------------------------------------------------------------|
| RC      | 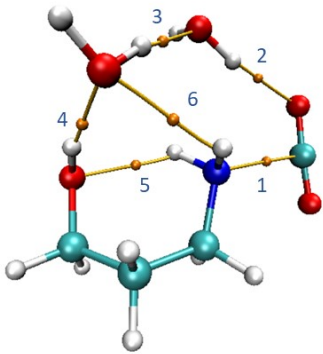   | 1              | N---C <sub>CO2</sub>                | 0.019                   | 0.063     |                                                                                                                                                                                   |
|         |                                                                                     | 2              | H <sub>W1</sub> ---O <sub>CO2</sub> | 0.015                   | 0.056     |                                                                                                                                                                                   |
|         |                                                                                     | 3              | H <sub>W2</sub> ---O <sub>W1</sub>  | 0.034                   | 0.128     |                                                                                                                                                                                   |
|         |                                                                                     | 4              | H <sub>OH</sub> ---O <sub>W2</sub>  | 0.035                   | 0.128     |                                                                                                                                                                                   |
|         |                                                                                     | 5              | H <sub>N</sub> ---O <sub>OH</sub>   | 0.019                   | 0.058     |                                                                                                                                                                                   |
|         |                                                                                     | 6              | O <sub>W2</sub> ---H <sub>N</sub>   | 0.011                   | 0.045     |                                                                                                                                                                                   |
| TS1     |   | 1              | N---C <sub>CO2</sub>                | 0.052                   | 0.104     | Strength of N---C <sub>CO2</sub> is slightly increased. However, due to the bending of CO <sub>2</sub> 175 <sup>0</sup> to 160 <sup>0</sup> overall energy is increased w.r.t. RC |
|         |                                                                                     | 2              | H <sub>W1</sub> ---O <sub>CO2</sub> | 0.023                   | 0.089     |                                                                                                                                                                                   |
|         |                                                                                     | 3              | H <sub>W2</sub> ---O <sub>W1</sub>  | 0.036                   | 0.135     |                                                                                                                                                                                   |
|         |                                                                                     | 4              | H <sub>OH</sub> ---O <sub>W2</sub>  | 0.035                   | 0.128     |                                                                                                                                                                                   |
|         |                                                                                     | 5              | H <sub>N</sub> ---O <sub>OH</sub>   | 0.019                   | 0.060     |                                                                                                                                                                                   |
|         |                                                                                     | 6              | O <sub>W2</sub> ---H <sub>N</sub>   | 0.012                   | 0.045     |                                                                                                                                                                                   |
| IM      |  | 1              | N---C <sub>CO2</sub>                | 0.201                   | -0.278    | Strength of N---C <sub>CO2</sub> increased<br>Strength of H <sub>W1</sub> ---O <sub>CO2</sub> slightly                                                                            |

|     |                                                                                     |   |                         |       |        |                                                                                                   |
|-----|-------------------------------------------------------------------------------------|---|-------------------------|-------|--------|---------------------------------------------------------------------------------------------------|
|     |                                                                                     | 2 | $H_{W1} \cdots O_{CO2}$ | 0.042 | 0.145  | increased<br>Overall energy is decreased w.r.t. TS1                                               |
|     |                                                                                     | 3 | $H_{W1} \cdots O_{W1}$  | 0.314 | -2.191 |                                                                                                   |
|     |                                                                                     | 4 | $H_{W2} \cdots O_{W1}$  | 0.041 | 0.148  |                                                                                                   |
|     |                                                                                     | 5 | $H_{W2} \cdots O_{W2}$  | 0.314 | -2.219 |                                                                                                   |
|     |                                                                                     | 6 | $O_{W2} \cdots H_N$     | 0.022 | 0.073  |                                                                                                   |
|     |                                                                                     | 7 | $H_N \cdots N$          | 0.317 | -1.533 |                                                                                                   |
|     |                                                                                     | 8 | $H_N \cdots O_{OH}$     | 0.025 | 0.078  |                                                                                                   |
|     |                                                                                     | 9 | $O_{W2} \cdots H_{OH}$  | 0.031 | 0.113  |                                                                                                   |
| TS2 | 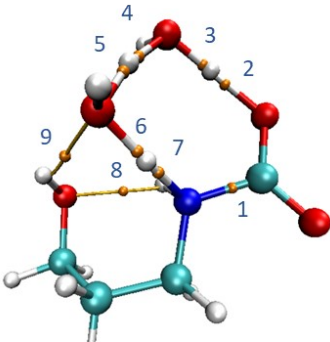 | 1 | $N \cdots C_{CO2}$      | 0.259 | -0.622 | Strength of $N \cdots C_{CO2}$ slightly increased<br>Strength of $H_{W1} \cdots O_{CO2}$ slightly |

|    |                                                                                     |   |                         |       |        |                                                                                                                      |
|----|-------------------------------------------------------------------------------------|---|-------------------------|-------|--------|----------------------------------------------------------------------------------------------------------------------|
|    |                                                                                     | 2 | $H_{W1} \cdots O_{CO2}$ | 0.010 | 0.071  | decreased<br>Strength of $H_{W1} \cdots O_{W1}$ decreased                                                            |
|    |                                                                                     | 3 | $H_{W1} \cdots O_{W1}$  | 0.235 | -1.012 | Strength of $H_{W2} \cdots O_{W1}$ increased<br>Strength of $H_{W2} \cdots O_{W2}$ decreased                         |
|    |                                                                                     | 4 | $H_{W2} \cdots O_{W1}$  | 0.142 | -0.129 | Strength of $O_{W2} \cdots H_N$ increased<br>Strength of $H_N \cdots N$ decreased                                    |
|    |                                                                                     | 5 | $H_{W2} \cdots O_{W2}$  | 0.183 | -0.383 | Strength of $H_N \cdots O_{OH}$ decreased<br>Strength of $O_{W2} \cdots H_{OH}$ slightly decreased                   |
|    |                                                                                     | 6 | $O_{W2} \cdots H_N$     | 0.190 | -0.420 | Overall energy is increased w.r.t IM                                                                                 |
|    |                                                                                     | 7 | $H_N \cdots N$          | 0.128 | -0.156 |                                                                                                                      |
|    |                                                                                     | 8 | $H_N \cdots O_{OH}$     | 0.235 | -1.012 |                                                                                                                      |
|    |                                                                                     | 9 | $O_{W2} \cdots H_{OH}$  | 0.020 | 0.063  |                                                                                                                      |
| PC | 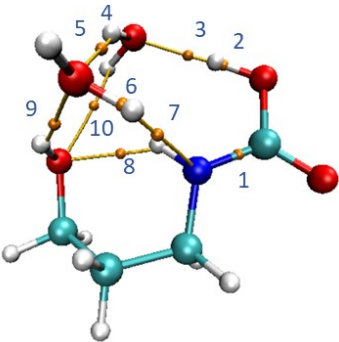 | 1 | $N \cdots C_{CO2}$      | 0.318 | -1.030 | Strong $N \cdots C_{CO2}$ interaction leading to N- C bond formation<br>Additional bond formations: $H_{CO2} \cdots$ |

|                                                                           |  |    |                            |       |        |                                                                                                              |
|---------------------------------------------------------------------------|--|----|----------------------------|-------|--------|--------------------------------------------------------------------------------------------------------------|
|                                                                           |  | 2  | $H_{CO_2} \cdots O_{CO_2}$ | 0.315 | -2.127 | $O_{CO_2}$ , $H_{W_2} \cdots O_{W_2}$ and $O_{W_1} \cdots H_{W_1}$<br>Overall energy is decreased w.r.t. TS2 |
|                                                                           |  | 3  | $H_{CO_2} \cdots O_{W_2}$  | 0.042 | 0.142  |                                                                                                              |
|                                                                           |  | 4  | $H_{W_2} \cdots O_{W_2}$   | 0.327 | -2.282 |                                                                                                              |
|                                                                           |  | 5  | $H_{W_2} \cdots O_{W_1}$   | 0.030 | 0.110  |                                                                                                              |
|                                                                           |  | 6  | $O_{W_1} \cdots H_{W_1}$   | 0.332 | -2.301 |                                                                                                              |
|                                                                           |  | 7  | $H_{W_1} \cdots N$         | 0.018 | 0.0519 |                                                                                                              |
|                                                                           |  | 8  | $H_N \cdots O_{OH}$        | 0.024 | 0.075  |                                                                                                              |
|                                                                           |  | 9  | $H_{OH} \cdots O_{W_1}$    | 0.026 | 0.095  |                                                                                                              |
|                                                                           |  | 10 | $H_{W_2} \cdots O_{OH}$    | 0.014 | 0.048  |                                                                                                              |
| <b>CO<sub>2</sub>-3A1P-2H<sub>2</sub>O involving four proton transfer</b> |  |    |                            |       |        |                                                                                                              |



| Species | Figure                                                                              | Critical point | Interaction type                    | Electron density (a.u.) | Laplacian | Analysis                                   |
|---------|-------------------------------------------------------------------------------------|----------------|-------------------------------------|-------------------------|-----------|--------------------------------------------|
| RC      | 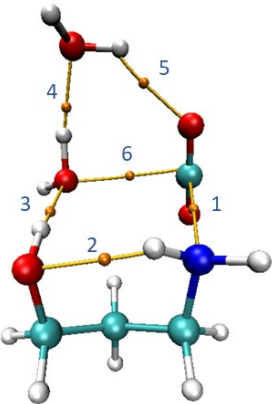   | 1              | N---C <sub>CO2</sub>                | 0.019                   | 0.061     |                                            |
|         |                                                                                     | 2              | H <sub>N</sub> ---O <sub>OH</sub>   | 0.020                   | 0.060     |                                            |
|         |                                                                                     | 3              | H <sub>OH</sub> ---O <sub>W1</sub>  | 0.036                   | 0.136     |                                            |
|         |                                                                                     | 4              | H <sub>W1</sub> ---O <sub>W2</sub>  | 0.037                   | 0.134     |                                            |
|         |                                                                                     | 5              | H <sub>W2</sub> ---O <sub>CO2</sub> | 0.017                   | 0.059     |                                            |
|         |                                                                                     | 6              | O <sub>W1</sub> ---C <sub>CO2</sub> | 0.012                   | 0.049     |                                            |
| TS1     |  | 1              | N---C <sub>CO2</sub>                | 0.063                   | 0.104     | Strength of N---C <sub>CO2</sub> increased |

|     |                                                                                     |   |                                     |       |        |                                                                                                                              |
|-----|-------------------------------------------------------------------------------------|---|-------------------------------------|-------|--------|------------------------------------------------------------------------------------------------------------------------------|
|     |                                                                                     | 2 | H <sub>N</sub> ---O <sub>OH</sub>   | 0.019 | 0.069  | Strength of H <sub>W2</sub> ---O <sub>CO2</sub> increased                                                                    |
|     |                                                                                     | 3 | H <sub>OH</sub> ---O <sub>W1</sub>  | 0.027 | 0.107  | Strength of O <sub>W1</sub> ---C <sub>CO2</sub> increased                                                                    |
|     |                                                                                     | 4 | H <sub>W1</sub> ---O <sub>W2</sub>  | 0.037 | 0.127  | O <sub>W1</sub> ---C <sub>CO2</sub> interaction disappeared                                                                  |
|     |                                                                                     | 5 | H <sub>W2</sub> ---O <sub>CO2</sub> | 0.020 | 0.067  | O <sub>OH</sub> ---H <sub>W2</sub> interaction appeared                                                                      |
|     |                                                                                     | 6 | O <sub>OH</sub> ---H <sub>W2</sub>  | 0.027 | 0.092  | Bending of CO <sub>2</sub> 173 <sup>o</sup> to 157 <sup>o</sup> and overall the energy is increased w.r.t. RC                |
| IM1 | 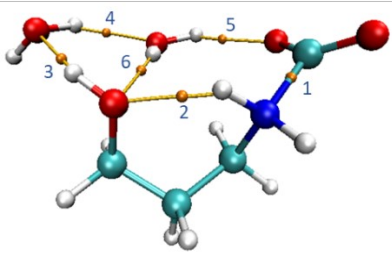   | 1 | N---C <sub>CO2</sub>                | 0.184 | -0.189 | Strength of N---C <sub>CO2</sub> increased<br>Overall energy is decreased w.r.t. TS1                                         |
|     |                                                                                     | 2 | H <sub>N</sub> ---O <sub>OH</sub>   | 0.026 | 0.094  |                                                                                                                              |
|     |                                                                                     | 3 | H <sub>OH</sub> ---O <sub>W1</sub>  | 0.024 | 0.093  |                                                                                                                              |
|     |                                                                                     | 4 | H <sub>W1</sub> ---O <sub>W2</sub>  | 0.039 | 0.133  |                                                                                                                              |
|     |                                                                                     | 5 | H <sub>W2</sub> ---O <sub>CO2</sub> | 0.026 | 0.090  |                                                                                                                              |
|     |                                                                                     | 6 | O <sub>OH</sub> ---H <sub>W2</sub>  | 0.026 | 0.091  |                                                                                                                              |
| TS2 |  | 1 | N---C <sub>CO2</sub>                | 0.195 | -0.246 | Strength of N---C <sub>CO2</sub> slightly increased                                                                          |
|     |                                                                                     | 2 | H <sub>N</sub> ---O <sub>OH</sub>   | 0.032 | 0.114  | Strength of H <sub>OH</sub> ---O <sub>W1</sub> slightly increased<br>Strength of H <sub>W1</sub> ---O <sub>W2</sub> slightly |

|     |                                                                                    |   |                                                   |       |        |                                                                                                                                                                    |
|-----|------------------------------------------------------------------------------------|---|---------------------------------------------------|-------|--------|--------------------------------------------------------------------------------------------------------------------------------------------------------------------|
|     |                                                                                    | 3 | $\text{H}_{\text{OH}}\cdots\text{O}_{\text{W1}}$  | 0.042 | 0.143  | decreased                                                                                                                                                          |
|     |                                                                                    | 4 | $\text{H}_{\text{W1}}\cdots\text{O}_{\text{W2}}$  | 0.030 | 0.107  | Strength of $\text{O}_{\text{OH}}\cdots\text{H}_{\text{W2}}$ slightly decreased                                                                                    |
|     |                                                                                    | 5 | $\text{H}_{\text{W2}}\cdots\text{O}_{\text{CO2}}$ | 0.034 | 0.128  | Overall energy is slightly increased w.r.t. IM1                                                                                                                    |
|     |                                                                                    | 6 | $\text{O}_{\text{OH}}\cdots\text{H}_{\text{W2}}$  | 0.016 | 0.050  |                                                                                                                                                                    |
| IM2 | 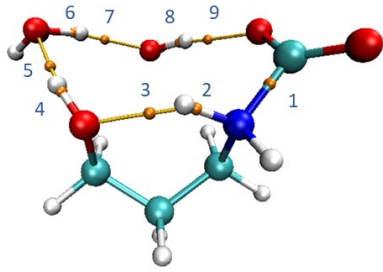 | 1 | $\text{N}\cdots\text{C}_{\text{CO2}}$             | 0.203 | -0.293 |                                                                                                                                                                    |
|     |                                                                                    | 2 | $\text{H}_{\text{N}}\cdots\text{N}$               | 0.307 | -1.504 | Strength of $\text{N}\cdots\text{C}_{\text{CO2}}$ slightly increased<br>Strength of $\text{H}_{\text{N}}\cdots\text{O}_{\text{OH}}$ slightly increased             |
|     |                                                                                    | 3 | $\text{H}_{\text{N}}\cdots\text{O}_{\text{OH}}$   | 0.038 | 0.126  | Strength of $\text{H}_{\text{OH}}\cdots\text{O}_{\text{W1}}$ slightly increased<br>Strength of $\text{H}_{\text{W1}}\cdots\text{O}_{\text{W2}}$ slightly increased |
|     |                                                                                    | 4 | $\text{H}_{\text{OH}}\cdots\text{O}_{\text{OH}}$  | 0.317 | -2.156 | Strength of $\text{H}_{\text{W2}}\cdots\text{O}_{\text{CO2}}$ slightly increased                                                                                   |
|     |                                                                                    | 5 | $\text{H}_{\text{OH}}\cdots\text{O}_{\text{W1}}$  | 0.045 | 0.150  | $\text{O}_{\text{OH}}\cdots\text{H}_{\text{W2}}$ interaction disappeared<br>Overall energy is decreased w.r.t. TS2                                                 |
|     |                                                                                    | 6 | $\text{O}_{\text{W1}}\cdots\text{H}_{\text{W1}}$  | 0.318 | -2.257 |                                                                                                                                                                    |
|     |                                                                                    | 7 | $\text{H}_{\text{W1}}\cdots\text{O}_{\text{W2}}$  | 0.039 | 0.149  |                                                                                                                                                                    |

|     |                                                                                    |   |                         |       |        |                                                                                                       |
|-----|------------------------------------------------------------------------------------|---|-------------------------|-------|--------|-------------------------------------------------------------------------------------------------------|
|     |                                                                                    | 8 | $O_{W2} \cdots H_{W2}$  | 0.316 | -2.236 |                                                                                                       |
|     |                                                                                    | 9 | $H_{W2} \cdots O_{CO2}$ | 0.040 | 0.149  |                                                                                                       |
| TS3 | 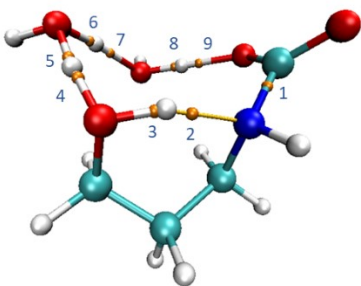 | 1 | $N \cdots C_{CO2}$      | 0.265 | -0.667 | Strength of $N \cdots C_{CO2}$ increased                                                              |
|     |                                                                                    | 2 | $H_N \cdots N$          | 0.078 | 0.092  | Strength of $H_N \cdots N$ decreased                                                                  |
|     |                                                                                    | 3 | $H_N \cdots O_{OH}$     | 0.260 | -1.294 | Strength of $H_N \cdots O_{OH}$ increased<br>Strength of $H_{OH} \cdots O_{OH}$ decreased             |
|     |                                                                                    | 4 | $H_{OH} \cdots O_{OH}$  | 0.173 | -0.303 | Strength of $H_{OH} \cdots O_{OH}$ increased<br>Strength of $O_{W1} \cdots H_{W1}$ decreased          |
|     |                                                                                    | 5 | $H_{OH} \cdots O_{W1}$  | 0.155 | -0.188 | Strength of $H_{W1} \cdots O_{W2}$ slightly increased<br>Strength of $O_{W2} \cdots H_{W2}$ decreased |
|     |                                                                                    | 6 | $O_{W1} \cdots H_{W1}$  | 0.253 | -1.338 | Strength of $H_{W2} \cdots O_{CO2}$ slightly increased                                                |
|     |                                                                                    | 7 | $H_{W1} \cdots O_{W2}$  | 0.086 | 0.126  | Overall energy is increased w.r.t. IM2                                                                |

|    |                                                                                    |   |                         |       |        |                                                                                                                                                                                                                                                                                                                           |
|----|------------------------------------------------------------------------------------|---|-------------------------|-------|--------|---------------------------------------------------------------------------------------------------------------------------------------------------------------------------------------------------------------------------------------------------------------------------------------------------------------------------|
|    |                                                                                    | 8 | $O_{W2} \cdots H_{W2}$  | 0.258 | -1.410 |                                                                                                                                                                                                                                                                                                                           |
|    |                                                                                    | 9 | $H_{W2} \cdots O_{CO2}$ | 0.082 | 0.135  |                                                                                                                                                                                                                                                                                                                           |
| PC | 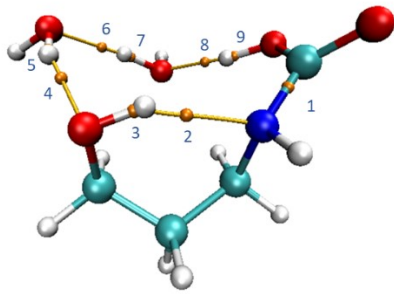 | 1 | $N \cdots C_{CO2}$      | 0.306 | -0.937 | <p>Strongest <math>N \cdots C_{CO2}</math> interaction leading to N- C bond formation</p> <p>Additional bond formations: <math>H_{OH} \cdots O_{OH}</math>, <math>H_{W1} \cdots O_{W1}</math>, <math>H_{W2} \cdots O_{W2}</math> and <math>H_{CO2} \cdots O_{CO2}</math></p> <p>Overall energy is decreased w.r.t. TS</p> |
|    |                                                                                    | 2 | $H_{OH} \cdots N$       | 0.029 | 0.087  |                                                                                                                                                                                                                                                                                                                           |
|    |                                                                                    | 3 | $H_{OH} \cdots O_{OH}$  | 0.334 | -2.215 |                                                                                                                                                                                                                                                                                                                           |
|    |                                                                                    | 4 | $H_{W1} \cdots O_{OH}$  | 0.039 | 0.133  |                                                                                                                                                                                                                                                                                                                           |
|    |                                                                                    | 5 | $H_{W1} \cdots O_{W1}$  | 0.319 | -2.221 |                                                                                                                                                                                                                                                                                                                           |
|    |                                                                                    | 6 | $O_{W1} \cdots H_{W2}$  | 0.046 | 0.152  |                                                                                                                                                                                                                                                                                                                           |
|    |                                                                                    | 7 | $H_{W2} \cdots O_{W2}$  | 0.306 | -2.132 |                                                                                                                                                                                                                                                                                                                           |

|  |  |   |                                   |       |        |  |
|--|--|---|-----------------------------------|-------|--------|--|
|  |  | 8 | $O_{w2} \leftrightarrow H_{CO2}$  | 0.056 | 0.166  |  |
|  |  | 9 | $H_{CO2} \leftrightarrow O_{CO2}$ | 0.296 | -1.950 |  |

The coordinates of all the species discussed in the manuscript are provided as a separate file in the xyz format.
